# Supplementary material for: Cell-Specific PEAR1 Methylation Studies Reveal a Locus that Coordinates Expression of Multiple Genes
Source: Int J Mol Sci. 2018 Apr 3;19(4):1069. doi: 10.3390/ijms19041069 (PMC5979289; doi:10.3390/ijms19041069)
Supplement: Supplementary file 1 [file ijms-19-01069-s001.xlsx]

## Sheet: Supplemental Table S1
	HUVECs		BOECs		MKs
PCGI1	Mean	SD	Mean	SD	Mean	SD
CpG1	0.00416667	0.00833333	0	0	0.03	0.06
CpG2	0.00583333	0.00957427	0	0	0.07	0.05
CpG3	0.0183333	0.0019245	0.0141667	0.00117851	0.05	0.03
CpG4-5	0.02	0.003849	0.02	0.00942809	0.17	0.02
CpG6	0.0258333	0.00569275	0.03	0.00942809	0.05	0.02
CpG7-8	0.0325	0.0280707	0.0216667	0.0164992	0.41	0.09
CpG11-13	0.0141667	0.00319142	0.0166667	0.00942809	0.23	0.05
CpG14	0.00416667	0.00833333	0	0	0.03	0.06
CpG15-16	0.00833333	0.0123228	0.00166667	0.00235702	0.11	0.05
CpG18	0.00583333	0.00419435	0.0116667	0.00235702	0.16	0.05
CpG19-20	0.015	0.0140106	0.00333333	0.00471405	0.45	0.09
CpG21	0.0141667	0.00917928	0.00833333	0.0117851	0.3	0.07
CpG22	0.0233333	0.0136083	0.00833333	0.00707107	0.29	0.12
CpG23	0.00583333	0.00957427	0	0	0.07	0.05
CpG24	0.0291667	0.00687184	0.0266667	0.00471405	0.09	0.03
CpG25-26	0.00583333	0.00569275	0.01	0.00942809	0.14	0.05
CpG27	0.0591667	0.0166389	0.04	0.00942809	0.06	0.02
CpG28-29	0.0025	0.00319142	0.00333333	0.00471405	0.13	0.06
CpG30	0.0291667	0.00687184	0.0266667	0.00471405	0.09	0.03
CpG31-32	0.005	0.00793492	0.00166667	0.00235702	0.17	0.05
Average	0.0617857	0.00548385	0.059246	0.00242063	0.18	0.03
	HUVECs		BOECs		MKs
Pintron	Mean	SD	Mean	SD	Mean	SD
CpG33-34	0.234167	0.0105443	0.025	0.0117851	0.981111	0.0101835
CpG35	0.343333	0.91	0.161667	0.0164992	0.883333	0.0152753
CpG36	0.343333	0.933333	0.161667	0.0164992	0.88	0
CpG37-38	0.0175	0.656667	0.0183333	0.00707107	0.541111	0.0183586
Average	0.234583	0.0125554	0.0916667	0.00916667	0.821389	0.00427633
	HUVECs		BOECs		MKs
PCGI2	Mean	SD	Mean	SD	Mean	SD
CpG39-40	0.758333	0.019341	0.901667	0.0542115	0.98375	0.00797856
CpG41	0.991667	0.0166667	1	0	0.961667	0.0663953
CpG42	0.798333	0.06245	0.961667	0.0353553	0.952917	0.0480812
CpG44-45	0.538333	0.0849619	0.281667	0.120208	0.908333	0.132035
CpG46-47	0.7425	0.0934672	0.716667	0.0659966	0.995833	0.0063099
CpG48	0.625833	0.0768536	0.588333	0.0353553	0.935833	0.0645999
CpG49-50	0.646667	0.0927362	0.665	0.148492	0.71	0.0229129
CpG51	0.955	0.0381517	0.991667	0.0117851	0.984583	0.0212296
CpG52	0.758333	0.019341	0.901667	0.0542115	0.98375	0.00797856
CpG55-57	0.665	0.05288	0.846667	0.0659966	1	0
CpG58-61	0.7325	0.0622644	0.788333	0.0447834	0.98	0.0216025
CpG62	0.38	0.0320878	0.371667	0.143778	0.92	0.088459
CpG63	0.806667	0.0921754	0.813333	0.0282843	0.8075	0.0997079
CpG64	0.974167	0.0225051	0.971667	0.0259272	0.964167	0.0651707
CpG65	0.8925	0.0383333	0.881667	0.124922	0.917083	0.0518612
Average	0.740046	0.0132623	0.766204	0.0137493	0.938875	0.028325

## Sheet: Supplemental Table S2
Sequenom Assay	Genomic Location*	Number of CpG sites studied
ISG20L2/RNNAD1	chr1: 156698128-156698370	29
HDGF	chr1: 156721015-156721170	14
PRCC	chr1: 156737783-156737984	10
Nucleotide positions according to the February 2009 human reference sequence (NCBI GRCh37/hg19) produced by the International Human Genome Sequencing Consortium

## Sheet: Supplemental Table S3
	HUVECs		MKs
	Average	SD	Average	SD
PEAR1	7.88102	0.279282	11.5002	1.38283
MRLP24	3.94667	0.303093	5.09343	0.812822
RRNAD1	8.48179	0.481903	7.01299	1.94747
ISG20L2	6.93058	0.428342	4.80744	0.892859
HDGF	4.56256	0.272169	3.296	0.704544
PRCC	5.66809	0.502648	3.85883	1.17711
Data are presented as average +/- SD of at least 3 biological replicates and reported as fold increase relative to GAPDH expression in arbitrary units
